# Supplementary material
Source: PubMed Central journal article supplement (PMC1283427)

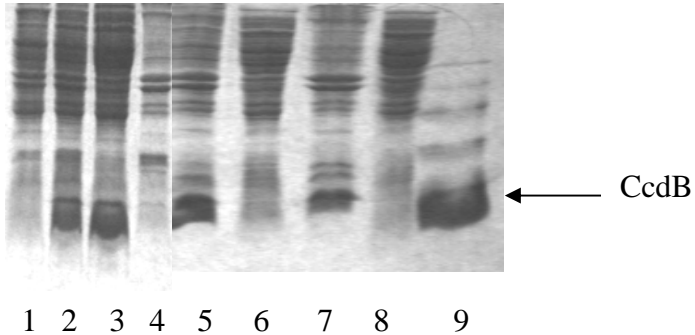

Supplement: pnas_0505089102_1.pdf [file pnas_0505089102_1.pdf]

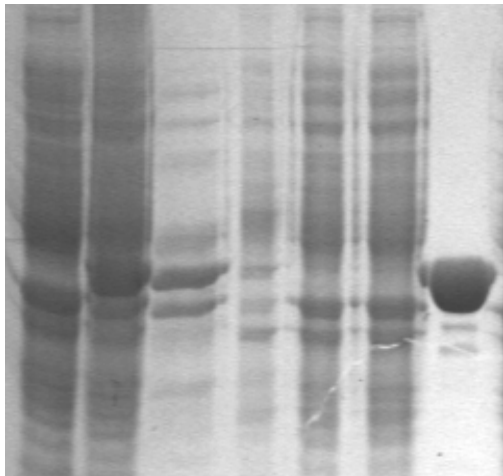

← MBP

1

2

3

4

5

6

7

Supplement: pnas_0505089102_2.pdf [file pnas_0505089102_2.pdf]

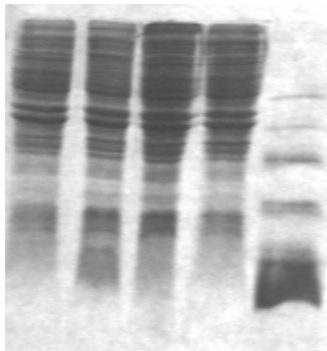

← Thioredoxin

1 2 3 4 5

Supplement: pnas_0505089102_3.pdf [file pnas_0505089102_3.pdf]

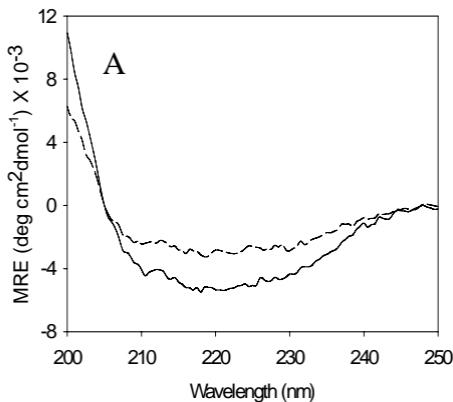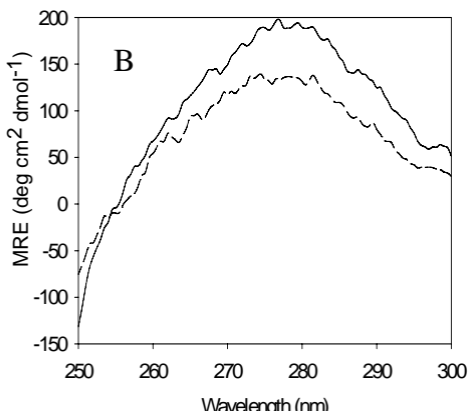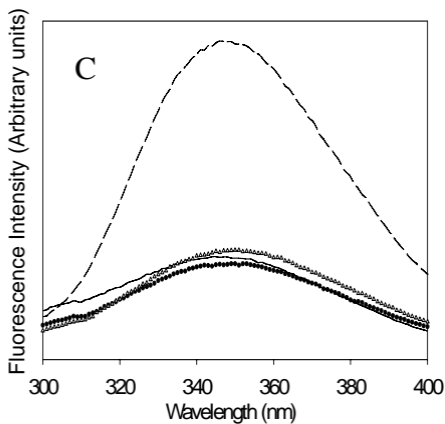

Supplement: pnas_0505089102_4.pdf [file pnas_0505089102_4.pdf]

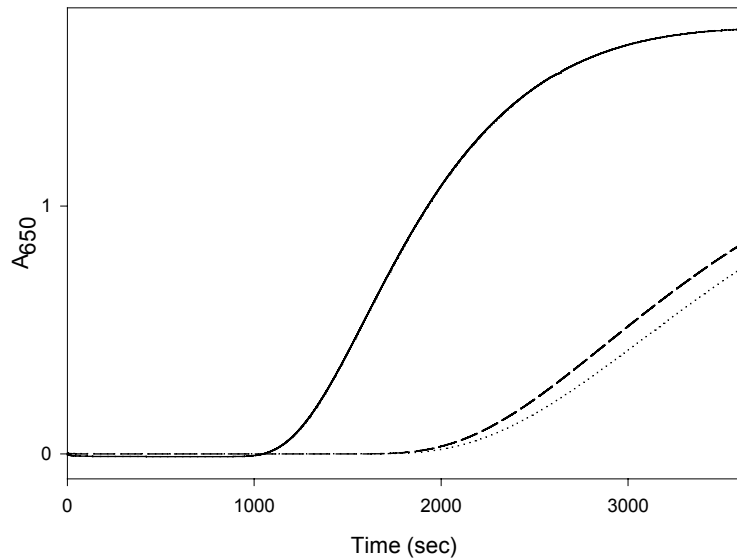

Supplement: pnas_0505089102_5.pdf [file pnas_0505089102_5.pdf]
